# Supplementary material for: Heterogeneity of Metabolic Vulnerability in Imatinib-Resistant Gastrointestinal Stromal Tumor
Source: MDPI journal article supplement (doi:10.3390/cells9061333), 2020-05-26
Supplement: s1 [file s1]

**Table S3.** Differentially expressed genes for OXPHOS and glycolysis gene sets between Cluster I and II

| Gene                                                   |                                                                    | Log Fold | p-    | False           |
|--------------------------------------------------------|--------------------------------------------------------------------|----------|-------|-----------------|
| symbol                                                 | Gene title                                                         | change   | value | discovery rates |
| <b><u>OXPHOS gene set</u></b>                          |                                                                    |          |       |                 |
| <b><i>Overexpressed in Cluster II vs Cluster I</i></b> |                                                                    |          |       |                 |
| NDUFA4                                                 | NDUFA4, mitochondrial complex associated                           | 0.531    | 0.000 | <b>0.018</b>    |
| COX7B                                                  | cytochrome c oxidase subunit 7B                                    | 0.657    | 0.000 | <b>0.018</b>    |
| NDUFA3                                                 | NADH:ubiquinone oxidoreductase subunit A3                          | 0.624    | 0.001 | <b>0.018</b>    |
| NDUFB7                                                 | NADH:ubiquinone oxidoreductase subunit B7                          | 0.630    | 0.001 | <b>0.018</b>    |
| COX5B                                                  | cytochrome c oxidase subunit 5B                                    | 0.789    | 0.001 | <b>0.019</b>    |
| UQCRC2                                                 | ubiquinol-cytochrome c reductase core protein II                   | 0.524    | 0.001 | <b>0.019</b>    |
| NDUFA9                                                 | NADH:ubiquinone oxidoreductase subunit A9                          | 0.528    | 0.003 | <b>0.055</b>    |
| NDUFS7                                                 | NADH:ubiquinone oxidoreductase core subunit S7                     | 0.320    | 0.003 | <b>0.055</b>    |
| COX6B1                                                 | cytochrome c oxidase subunit 6B1                                   | 0.476    | 0.004 | <b>0.055</b>    |
| NDUFS1                                                 | NADH:ubiquinone oxidoreductase core subunit S1                     | 0.603    | 0.004 | <b>0.055</b>    |
| COX5A                                                  | cytochrome c oxidase subunit 5A                                    | 0.463    | 0.005 | <b>0.057</b>    |
| NDUFA8                                                 | NADH:ubiquinone oxidoreductase subunit A8                          | 0.55     | 0.006 | <b>0.065</b>    |
| NDUFB3                                                 | NADH:ubiquinone oxidoreductase subunit B3                          | 0.650    | 0.006 | <b>0.065</b>    |
| COX11                                                  | COX11, cytochrome c oxidase copper chaperone                       | 0.437    | 0.007 | <b>0.065</b>    |
| NDUFA11                                                | NADH:ubiquinone oxidoreductase subunit A11                         | 0.340    | 0.007 | <b>0.065</b>    |
| SDHC                                                   | succinate dehydrogenase complex subunit C                          | 0.362    | 0.008 | <b>0.068</b>    |
| COX7A2L                                                | cytochrome c oxidase subunit 7A2 like                              | 0.699    | 0.008 | <b>0.070</b>    |
| NDUFA1                                                 | NADH:ubiquinone oxidoreductase subunit A1                          | 0.278    | 0.010 | <b>0.075</b>    |
| NDUFA7                                                 | NADH:ubiquinone oxidoreductase subunit A7                          | 0.341    | 0.011 | <b>0.079</b>    |
| ATP6V0E1                                               | ATPase H <sup>+</sup> transporting V0 subunit e1                   | 0.433    | 0.013 | <b>0.089</b>    |
| UQCRQ                                                  | ubiquinol-cytochrome c reductase complex III subunit VII           | 0.483    | 0.015 | <b>0.090</b>    |
| NDUFAB1                                                | NADH:ubiquinone oxidoreductase subunit AB1                         | 0.373    | 0.016 | <b>0.090</b>    |
| COX4I2                                                 | cytochrome c oxidase subunit 4I2                                   | 0.366    | 0.016 | <b>0.090</b>    |
| COX7A1                                                 | cytochrome c oxidase subunit 7A1                                   | 0.731    | 0.016 | <b>0.090</b>    |
| NDUFB5                                                 | NADH:ubiquinone oxidoreductase subunit B5                          | 0.397    | 0.020 | <b>0.104</b>    |
| UQCRFS1                                                | ubiquinol-cytochrome c reductase, Rieske iron-sulfur polypeptide 1 | 0.378    | 0.022 | <b>0.106</b>    |
| ATP6V1E2                                               | ATPase H <sup>+</sup> transporting V1 subunit E2                   | 0.468    | 0.025 | <b>0.114</b>    |
| SDHB                                                   | succinate dehydrogenase complex iron sulfur subunit B              | 0.314    | 0.027 | <b>0.114</b>    |
| CYC1                                                   | cytochrome c1                                                      | 0.547    | 0.027 | <b>0.114</b>    |
| NDUFS2                                                 | NADH:ubiquinone oxidoreductase core subunit S2                     | 0.393    | 0.034 | <b>0.132</b>    |
| COX6A1                                                 | cytochrome c oxidase subunit 6A1                                   | 0.231    | 0.036 | <b>0.134</b>    |
| UQCR11                                                 | ubiquinol-cytochrome c reductase, complex III subunit XI           | 0.265    | 0.038 | <b>0.134</b>    |
| COX7C                                                  | cytochrome c oxidase subunit 7C                                    | 0.455    | 0.038 | <b>0.134</b>    |
| COX4I1                                                 | cytochrome c oxidase subunit 4I1                                   | 0.245    | 0.038 | <b>0.134</b>    |
| SDHA                                                   | succinate dehydrogenase complex flavoprotein subunit A             | 0.455    | 0.040 | <b>0.137</b>    |
| COX15                                                  | COX15, cytochrome c oxidase assembly homolog                       | 0.290    | 0.041 | <b>0.137</b>    |
| NDUFV2                                                 | NADH:ubiquinone oxidoreductase core subunit V2                     | 0.492    | 0.041 | <b>0.137</b>    |
| UQCRC1                                                 | ubiquinol-cytochrome c reductase core protein I                    | 0.349    | 0.046 | <b>0.145</b>    |
| NDUFV1                                                 | NADH:ubiquinone oxidoreductase core subunit V1                     | 0.245    | 0.059 | <b>0.175</b>    |
| COX7B2                                                 | cytochrome c oxidase subunit 7B2                                   | 0.179    | 0.059 | <b>0.175</b>    |
| NDUFA2                                                 | NADH:ubiquinone oxidoreductase subunit A2                          | 0.287    | 0.062 | <b>0.175</b>    |
| COX6A2                                                 | cytochrome c oxidase subunit 6A2                                   | 0.399    | 0.062 | <b>0.175</b>    |

|                 |                                                                        |       |       |              |
|-----------------|------------------------------------------------------------------------|-------|-------|--------------|
| <i>NDUFA10</i>  | NADH:ubiquinone oxidoreductase subunit A10                             | 0.163 | 0.063 | <b>0.175</b> |
| <i>SDHD</i>     | succinate dehydrogenase complex subunit D                              | 0.238 | 0.076 | <b>0.190</b> |
| <i>NDUFB10</i>  | NADH:ubiquinone oxidoreductase subunit B10                             | 0.249 | 0.077 | <b>0.190</b> |
| <i>NDUFA6</i>   | NADH:ubiquinone oxidoreductase subunit A6                              | 0.407 | 0.085 | 0.205        |
| <i>NDUFV3</i>   | NADH:ubiquinone oxidoreductase subunit V3                              | 0.307 | 0.093 | 0.215        |
| <i>NDUFB2</i>   | NADH:ubiquinone oxidoreductase subunit B2                              | 0.264 | 0.094 | 0.215        |
| <i>ATP6AP1</i>  | ATPase H+ transporting accessory protein 1                             | 0.239 | 0.108 | 0.238        |
| <i>NDUFB9</i>   | NADH:ubiquinone oxidoreductase subunit B9                              | 0.348 | 0.134 | 0.282        |
| <i>NDUFB6</i>   | NADH:ubiquinone oxidoreductase subunit B6                              | 0.225 | 0.140 | 0.291        |
| <i>UQCRB</i>    | ubiquinol-cytochrome c reductase binding protein                       | 0.415 | 0.144 | 0.296        |
| <i>COX8A</i>    | cytochrome c oxidase subunit 8A                                        | 0.289 | 0.148 | 0.300        |
| <i>NDUFC1</i>   | NADH:ubiquinone oxidoreductase subunit C1                              | 0.238 | 0.153 | 0.306        |
| <i>ATP6V1C1</i> | ATPase H+ transporting V1 subunit C1                                   | 0.313 | 0.179 | 0.345        |
| <i>ATP6V0B</i>  | ATPase H+ transporting V0 subunit b                                    | 0.298 | 0.212 | 0.384        |
| <i>ATP6V1G1</i> | ATPase H+ transporting V1 subunit G1                                   | 0.270 | 0.214 | 0.384        |
| <i>NDUFS3</i>   | NADH:ubiquinone oxidoreductase core subunit S3                         | 0.296 | 0.234 | 0.409        |
| <i>COX6C</i>    | cytochrome c oxidase subunit 6C                                        | 0.148 | 0.287 | 0.467        |
| <i>ATP6V0A4</i> | ATPase H+ transporting V0 subunit a4                                   | 0.066 | 0.426 | 0.646        |
| <i>ATP6V1A</i>  | ATPase H+ transporting V1 subunit A                                    | 0.126 | 0.436 | 0.653        |
| <i>PPA1</i>     | pyrophosphatase (inorganic) 1                                          | 0.210 | 0.456 | 0.659        |
| <i>ATP6V0E2</i> | ATPase H+ transporting V0 subunit e2                                   | 0.265 | 0.458 | 0.659        |
| <i>COX6B2</i>   | cytochrome c oxidase subunit 6B2                                       | 0.073 | 0.465 | 0.659        |
| <i>COX7A2</i>   | cytochrome c oxidase subunit 7A2                                       | 0.156 | 0.511 | 0.699        |
| <i>ATP6V1D</i>  | ATPase H+ transporting V1 subunit D                                    | 0.092 | 0.575 | 0.741        |
| <i>NDUFS4</i>   | NADH:ubiquinone oxidoreductase subunit S4                              | 0.075 | 0.647 | 0.783        |
| <i>NDUFA4L2</i> | NDUFA4, mitochondrial complex associated like 2                        | 0.083 | 0.706 | 0.841        |
| <i>ATP4A</i>    | ATPase H+/K+ transporting alpha subunit                                | 0.038 | 0.775 | 0.896        |
| <i>NDUFS6</i>   | NADH:ubiquinone oxidoreductase subunit S6                              | 0.042 | 0.843 | 0.946        |
| <i>UQCR10</i>   | ubiquinol-cytochrome c reductase, complex III subunit X                | 0.027 | 0.892 | 0.967        |
| <i>COX10</i>    | COX10, heme A:farnesyltransferase cytochrome c oxidase assembly factor | 0.015 | 0.905 | 0.967        |
| <i>PPA2</i>     | pyrophosphatase (inorganic) 2                                          | 0.013 | 0.933 | 0.990        |
| <i>ATP6V1G3</i> | ATPase H+ transporting V1 subunit G3                                   | 0.005 | 0.959 | 0.992        |
| <i>ATP6V1G2</i> | ATPase H+ transporting V1 subunit G2                                   | 0.016 | 0.969 | 0.992        |
| <i>NDUFB8</i>   | NADH:ubiquinone oxidoreductase subunit B8                              | 0.004 | 0.971 | 0.992        |
| <i>ATP4B</i>    | ATPase H+/K+ transporting beta subunit                                 | 0.001 | 0.993 | 0.995        |

#### ***Underexpressed in Cluster II vs Cluster I***

|                 |                                                                    |        |       |              |
|-----------------|--------------------------------------------------------------------|--------|-------|--------------|
| <i>ATP6V0A1</i> | ATPase H+ transporting V0 subunit a1                               | -0.657 | 0.005 | <b>0.057</b> |
| <i>ATP6V1H</i>  | ATPase H+ transporting V1 subunit H                                | -0.387 | 0.027 | <b>0.114</b> |
| <i>ATP12A</i>   | ATPase H+/K+ transporting non-gastric alpha2 subunit               | -0.204 | 0.045 | <b>0.145</b> |
| <i>ATP6V0D2</i> | ATPase H+ transporting V0 subunit d2                               | -0.200 | 0.064 | <b>0.175</b> |
| <i>ATP6V1B2</i> | ATPase H+ transporting V1 subunit B2                               | -0.419 | 0.118 | 0.256        |
| <i>NDUFB4</i>   | NADH:ubiquinone oxidoreductase subunit B4                          | -0.112 | 0.217 | 0.384        |
| <i>COX8C</i>    | cytochrome c oxidase subunit 8C                                    | -0.088 | 0.243 | 0.416        |
| <i>COX17</i>    | COX17, cytochrome c oxidase copper chaperone                       | -0.144 | 0.392 | 0.599        |
| <i>LHPP</i>     | phospholysine phosphohistidine inorganic pyrophosphate phosphatase | -0.162 | 0.475 | 0.665        |
| <i>ATP6V0D1</i> | ATPase H+ transporting V0 subunit d1                               | -0.116 | 0.534 | 0.713        |
| <i>NDUFB1</i>   | NADH:ubiquinone oxidoreductase subunit B1                          | -0.110 | 0.535 | 0.713        |
| <i>NDUFA5</i>   | NADH:ubiquinone oxidoreductase subunit A5                          | -0.051 | 0.638 | 0.783        |

|                 |                                                                             |        |       |       |
|-----------------|-----------------------------------------------------------------------------|--------|-------|-------|
| <i>ATP6V1E1</i> | ATPase H <sup>+</sup> transporting V1 subunit E1                            | -0.130 | 0.641 | 0.783 |
| <i>TCIRG1</i>   | T-cell immune regulator 1, ATPase H <sup>+</sup> transporting V0 subunit a3 | -0.161 | 0.642 | 0.783 |
| <i>ATP6V1C2</i> | ATPase H <sup>+</sup> transporting V1 subunit C2                            | -0.019 | 0.825 | 0.939 |
| <i>ATP6V0A2</i> | ATPase H <sup>+</sup> transporting V0 subunit a2                            | -0.029 | 0.840 | 0.946 |
| <i>ATP6V1B1</i> | ATPase H <sup>+</sup> transporting V1 subunit B1                            | -0.015 | 0.890 | 0.967 |
| <i>ATP6V0C</i>  | ATPase H <sup>+</sup> transporting V0 subunit c                             | -0.001 | 0.995 | 0.995 |

### **Glycolysis gene set**

#### ***Overexpressed in Cluster II vs Cluster I***

|                |                                                       |       |       |              |
|----------------|-------------------------------------------------------|-------|-------|--------------|
| <i>ALDH1B1</i> | aldehyde dehydrogenase 1 family member B1             | 0.590 | 0.001 | <b>0.018</b> |
| <i>PDHB</i>    | pyruvate dehydrogenase (lipoamide) beta               | 0.546 | 0.011 | <b>0.080</b> |
| <i>PGK1</i>    | phosphoglycerate kinase 1                             | 0.592 | 0.014 | <b>0.090</b> |
| <i>DLAT</i>    | dihydrolipoamide S-acetyltransferase                  | 0.618 | 0.018 | <b>0.098</b> |
| <i>PGK2</i>    | phosphoglycerate kinase 2                             | 0.213 | 0.021 | <b>0.106</b> |
| <i>ALDOA</i>   | aldolase, fructose-bisphosphate A                     | 0.415 | 0.024 | <b>0.114</b> |
| <i>BPGM</i>    | bisphosphoglycerate mutase                            | 0.697 | 0.029 | <b>0.117</b> |
| <i>GPI</i>     | glucose-6-phosphate isomerase                         | 0.523 | 0.054 | <b>0.170</b> |
| <i>LDHB</i>    | lactate dehydrogenase B                               | 0.363 | 0.062 | <b>0.175</b> |
| <i>DLD</i>     | dihydrolipoamide dehydrogenase                        | 0.424 | 0.067 | <b>0.177</b> |
| <i>GCK</i>     | glucokinase                                           | 0.522 | 0.073 | <b>0.190</b> |
| <i>PGAM1</i>   | phosphoglycerate mutase 1                             | 0.348 | 0.078 | <b>0.190</b> |
| <i>ALDH2</i>   | aldehyde dehydrogenase 2 family (mitochondrial)       | 0.457 | 0.108 | 0.238        |
| <i>LDHC</i>    | lactate dehydrogenase C                               | 0.346 | 0.167 | 0.330        |
| <i>LDHAL6A</i> | lactate dehydrogenase A like 6A                       | 0.271 | 0.173 | 0.337        |
| <i>PGM1</i>    | phosphoglucomutase 1                                  | 0.272 | 0.182 | 0.347        |
| <i>PDHA2</i>   | pyruvate dehydrogenase (lipoamide) alpha 2            | 0.125 | 0.191 | 0.359        |
| <i>ENO1</i>    | enolase 1                                             | 0.342 | 0.208 | 0.381        |
| <i>FBP2</i>    | fructose-bisphosphatase 2                             | 0.115 | 0.253 | 0.428        |
| <i>PDHA1</i>   | pyruvate dehydrogenase (lipoamide) alpha 1            | 0.233 | 0.255 | 0.428        |
| <i>GALM</i>    | galactose mutarotase                                  | 0.162 | 0.282 | 0.467        |
| <i>HK2</i>     | hexokinase 2                                          | 0.226 | 0.285 | 0.467        |
| <i>LDHA</i>    | lactate dehydrogenase A                               | 0.295 | 0.300 | 0.483        |
| <i>ADH5</i>    | alcohol dehydrogenase 5 (class III), chi polypeptide  | 0.201 | 0.310 | 0.494        |
| <i>ALDOC</i>   | aldolase, fructose-bisphosphate C                     | 0.343 | 0.342 | 0.529        |
| <i>TPI1</i>    | triosephosphate isomerase 1                           | 0.179 | 0.449 | 0.659        |
| <i>PKLR</i>    | pyruvate kinase, liver and RBC                        | 0.062 | 0.463 | 0.659        |
| <i>HK3</i>     | hexokinase 3                                          | 0.102 | 0.545 | 0.720        |
| <i>ENO2</i>    | enolase 2                                             | 0.418 | 0.567 | 0.741        |
| <i>PKM</i>     | pyruvate kinase, muscle                               | 0.127 | 0.594 | 0.759        |
| <i>PFKM</i>    | phosphofructokinase, muscle                           | 0.129 | 0.604 | 0.766        |
| <i>ALDH3A1</i> | aldehyde dehydrogenase 3 family member A1             | 0.045 | 0.615 | 0.773        |
| <i>PFKP</i>    | phosphofructokinase, platelet                         | 0.115 | 0.647 | 0.783        |
| <i>ADH1C</i>   | alcohol dehydrogenase 1C (class I), gamma polypeptide | 0.207 | 0.740 | 0.875        |
| <i>ADH1A</i>   | alcohol dehydrogenase 1A (class I), alpha polypeptide | 0.046 | 0.746 | 0.875        |
| <i>ALDH3A2</i> | aldehyde dehydrogenase 3 family member A2             | 0.048 | 0.809 | 0.928        |
| <i>GAPDH</i>   | glyceraldehyde-3-phosphate dehydrogenase              | 0.039 | 0.865 | 0.960        |
| <i>PCK2</i>    | phosphoenolpyruvate carboxykinase 2, mitochondrial    | 0.038 | 0.868 | 0.960        |
| <i>PGAM2</i>   | phosphoglycerate mutase 2                             | 0.054 | 0.902 | 0.967        |
| <i>ENO3</i>    | enolase 3                                             | 0.006 | 0.964 | 0.992        |

|                |                                           |       |       |       |
|----------------|-------------------------------------------|-------|-------|-------|
| <i>ALDOB</i>   | aldolase, fructose-bisphosphate B         | 0.002 | 0.973 | 0.992 |
| <i>ALDH9A1</i> | aldehyde dehydrogenase 9 family member A1 | 0.003 | 0.987 | 0.995 |

***Underexpressed in Cluster II vs Cluster I***

|                |                                                             |        |       |              |
|----------------|-------------------------------------------------------------|--------|-------|--------------|
| <i>PFKL</i>    | phosphofructokinase, liver type                             | -0.706 | 0.031 | <b>0.126</b> |
| <i>ALDH1A3</i> | aldehyde dehydrogenase 1 family member A3                   | -0.981 | 0.065 | <b>0.176</b> |
| <i>ALDH3B1</i> | aldehyde dehydrogenase 3 family member B1                   | -0.169 | 0.076 | <b>0.190</b> |
| <i>G6PC2</i>   | glucose-6-phosphatase catalytic subunit 2                   | -0.218 | 0.091 | 0.215        |
| <i>ACSS1</i>   | acyl-CoA synthetase short-chain family member 1             | -0.169 | 0.105 | 0.238        |
| <i>ADH1B</i>   | alcohol dehydrogenase 1B (class I), beta polypeptide        | -0.690 | 0.127 | 0.271        |
| <i>ACSS2</i>   | acyl-CoA synthetase short-chain family member 2             | -0.154 | 0.195 | 0.362        |
| <i>LDHAL6B</i> | lactate dehydrogenase A like 6B                             | -0.099 | 0.240 | 0.416        |
| <i>HK1</i>     | hexokinase 1                                                | -0.267 | 0.329 | 0.519        |
| <i>G6PC</i>    | glucose-6-phosphatase catalytic subunit                     | -0.126 | 0.340 | 0.529        |
| <i>ALDH3B2</i> | aldehyde dehydrogenase 3 family member B2                   | -0.053 | 0.442 | 0.657        |
| <i>PGM2</i>    | phosphoglucomutase 2                                        | -0.120 | 0.477 | 0.665        |
| <i>PCK1</i>    | phosphoenolpyruvate carboxykinase 1                         | -0.160 | 0.491 | 0.678        |
| <i>FBP1</i>    | fructose-bisphosphatase 1                                   | -0.226 | 0.518 | 0.703        |
| <i>ADH6</i>    | alcohol dehydrogenase 6 (class V)                           | -0.044 | 0.570 | 0.741        |
| <i>ALDH7A1</i> | aldehyde dehydrogenase 7 family member A1                   | -0.068 | 0.682 | 0.818        |
| <i>AKR1A1</i>  | aldo-keto reductase family 1 member A1                      | -0.051 | 0.752 | 0.876        |
| <i>ADH7</i>    | alcohol dehydrogenase 7 (class IV), mu or sigma polypeptide | -0.009 | 0.899 | 0.967        |
| <i>ADH4</i>    | alcohol dehydrogenase 4 (class II), pi polypeptide          | -0.006 | 0.940 | 0.991        |

---

Differentially expressed genes (false discovery rate <0.2) used for clustering analysis are indicated in bold
