# Supplementary material for: Heterogeneity of Metabolic Vulnerability in Imatinib-Resistant Gastrointestinal Stromal Tumor
Source: MDPI journal article supplement (doi:10.3390/cells9061333), 2020-05-26
Supplement: s1 [file s1]

**Table S1.** Clinical features, mutation status and imatinib treatment for the 35 GIST cases studied.

| Case no. | Gender / age (yr) | Mutations  |               | Tumor sample | Tumor size (cm) | Preoperative imatinib |                |
|----------|-------------------|------------|---------------|--------------|-----------------|-----------------------|----------------|
|          |                   | <i>KIT</i> | <i>PDGFRA</i> |              |                 | Period                | Response at op |
| GIST1    | M / 39            | MUT        | wt            | Primary      | 5               | 36 m                  | Resistant      |
| GIST2    | F / 39            | wt         | MUT           | Recurrent    | 2               | 15 m                  | Resistant      |
| GIST3    | M / 58            | wt         | MUT           | Primary      | 16              | 3 m                   | Resistant      |
| GIST4    | F / 59            | MUT        | wt            | Recurrent    | 3.7             | >96 m                 | Resistant      |
| GIST5    | M / 33            | MUT        | wt            | Recurrent    | 10              | 18 m                  | Resistant      |
| GIST6*   | F / 44            | MUT        | wt            | Recurrent    | 4.5-30          | 10 m                  | Resistant      |
| GIST7*   | M / 46            | MUT        | wt            | Primary      | 1-9.3           | >48 m                 | Resistant      |
| GIST8    | M / 50            | MUT        | wt            | Primary      | 5               | 12 m                  | Sensitive      |
| GIST9    | F / 54            | MUT        | wt            | Primary      | 12              | 12 m                  | Sensitive      |
| GIST10   | F / 71            | MUT        | wt            | Primary      | 6               | 6 m                   | Sensitive      |
| GIST11   | M / 67            | wt         | MUT           | Primary      | 17              | 6 m                   | Sensitive      |
| GIST12   | M / 24            | wt         | wt            | Primary      | 10              | 2 m                   | Sensitive      |
| GIST13   | F / 51            | MUT        | wt            | Primary      | 6               | 18 m                  | Sensitive      |
| GIST14   | M / 35            | MUT        | wt            | Primary      | 3               | 10 m                  | Sensitive      |
| GIST15   | F / 59            | MUT        | wt            | Primary      | 7               | 5 m                   | Sensitive      |
| GIST16   | M / 75            | MUT        | wt            | Recurrent    | multiple        | no                    | Untreated      |
| GIST17   | F / 72            | MUT        | wt            | Primary      | 5.4             | no                    | Untreated      |
| GIST18   | F / 57            | MUT        | wt            | Recurrent    | multiple        | no                    | Untreated      |
| GIST19   | F / 56            | MUT        | wt            | Primary      | 12              | no                    | Untreated      |
| GIST20   | M / 49            | MUT        | wt            | Primary      | 8.5             | no                    | Untreated      |
| GIST21   | M / 55            | MUT        | wt            | Primary      | 4               | no                    | Untreated      |
| GIST22   | F / 54            | MUT        | wt            | Primary      | 22              | no                    | Untreated      |
| GIST23   | F / 73            | MUT        | wt            | Primary      | 10              | no                    | Untreated      |
| GIST24   | M / 69            | MUT        | wt            | Primary      | 6.7             | no                    | Untreated      |
| GIST25   | M / 82            | MUT        | wt            | Primary      | 8               | no                    | Untreated      |
| GIST26   | F / 70            | MUT        | wt            | Recurrent    | 3               | no                    | Untreated      |
| GIST27   | M / 63            | MUT        | wt            | Recurrent    | 7               | no                    | Untreated      |
| GIST28   | M / 70            | MUT        | wt            | Primary      | 6               | no                    | Untreated      |
| GIST29   | M / 57            | MUT        | wt            | Recurrent    | 6               | no                    | Untreated      |
| GIST30   | F / 79            | MUT        | wt            | Primary      | 10.5            | no                    | Untreated      |
| GIST31   | F / 65            | MUT        | wt            | Primary      | 19              | no                    | Untreated      |
| GIST32   | F / 36            | MUT        | wt            | Primary      | 26              | no                    | Untreated      |
| GIST33   | M / 71            | MUT        | wt            | Primary      | 10              | no                    | Untreated      |
| GIST34   | M / 65            | MUT        | wt            | Primary      | 7               | no                    | Untreated      |
| GIST35   | F / 52            | MUT        | wt            | Primary      | 3               | no                    | Untreated      |

\*GIST6 and GIST7 had multiple tumors

yr, year; m, month; M, male; F, female; MUT, mutated; wt, wild-type; op, operation
