# Supplementary material for: Heterogeneity of Metabolic Vulnerability in Imatinib-Resistant Gastrointestinal Stromal Tumor
Source: MDPI journal article supplement (doi:10.3390/cells9061333), 2020-05-26
Supplement: s1 [file s1]

**Table S2.** Short tandem repeat profiles of the 5 human GIST cell lines in this study

| Locus          | GIST 882 |      | GIST 882R |      | GIST T1 |      | GIST T1R |      | GIST 48 |      |
|----------------|----------|------|-----------|------|---------|------|----------|------|---------|------|
|                | AI 1     | AI 2 | AI 1      | AI 2 | AI 1    | AI 2 | AI 1     | AI 2 | AI 1    | AI 2 |
| <i>D8S1179</i> | 12       | 12   | 12        | 12   | 13      | 13   | 13       | 13   | 13      | 13   |
| <i>D21S11</i>  | 29       | 31.2 | 29        | 31.2 | 29      | 31   | 29       | 31   | 29      | 29   |
| <i>D7S820</i>  | 10       | 15   | 10        | 15   | 11      | 12   | 11       | 12   | 9       | 12   |
| <i>CSF1PO</i>  | 11       | 11   | 11        | 11   | 10      | 12   | 10       | 12   | 11      | 12   |
| <i>D3S1358</i> | 15       | 15   | 15        | 15   | 15      | 15   | 15       | 15   | 14      | 17   |
| <i>TH01</i>    | 9        | 9    | 9         | 9    | 7       | 9    | 7        | 9    | 6       | 6    |
| <i>D13S317</i> | 12       | 12   | 12        | 12   | 11      | 11   | 11       | 11   | 13      | 13   |
| <i>D16S539</i> | 11       | 11   | 11        | 11   | 11      | 13   | 11       | 13   | 13      | 14   |
| <i>D2S1338</i> | 18       | 26   | 18        | 26   | 17      | 26   | 17       | 26   | 16      | 19   |
| <i>D19S433</i> | 13       | 15   | 13        | 15   | 14      | 15   | 14       | 15   | 13      | 17.2 |
| <i>vWA</i>     | 16       | 17   | 16        | 17   | 14      | 14   | 14       | 14   | 14      | 15   |
| <i>TPOX</i>    | 11       | 11   | 11        | 11   | 11      | 11   | 11       | 11   | 8       | 11   |
| <i>D18S51</i>  | 14       | 14   | 14        | 14   | 14      | 14   | 14       | 14   | 17      | 18   |
| <i>AMEL</i>    | X        | Y    | X         | Y    | X       | X    | X        | X    | X       | Y    |
| <i>D5S818</i>  | 12       | 12   | 12        | 12   | 10      | 10   | 10       | 10   | 11      | 11   |
| <i>FGA</i>     | 23       | 23   | 23        | 23   | 22      | 23   | 22       | 23   | 20      | 20   |

AI 1, Allele 1; AI 2, Allele 2
